# Supplementary material
Source: ML conference proceedings conference paper supplement (https://openreview.net/forum?id=AnDDMQgM7-)
Supplement: supplementary_material [file attachment]

## A Illustration of Group and Group Representation in CarFlag-2D

**Domain** We consider a small version of CarFlag-2D (see Figure 9) with a grid size of  $3 \times 3$ , where the agent (red) must navigate to an unknown target cell (green) in a grid world. The agent can always observe its current location but only observe the target cell when it visits the information cell (blue), which is also unknown to the agent.

**Observation** The observation is a two-channel image size  $2 \times 3 \times 3$ , where the first channel encodes the agent's location and the second encodes the target location. The values of the second channel are non-zero only when the agent is at the information cell (Figure 9).

**Actions** Movements in four directions (the location does not change if going out of the world).

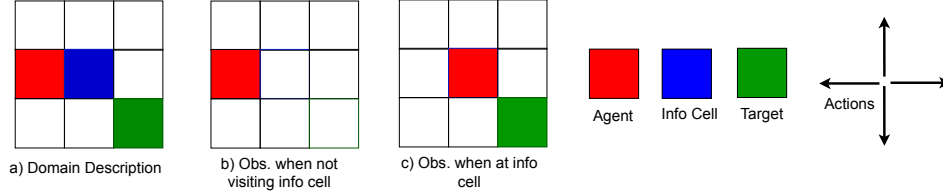

Figure 9: Illustration of the domain, action, and observation.

**Domain Symmetry** Consider Scenario 1 and Scenario 2 in Figure 10: Scenario 2 is the rotated version of Scenario 1 after a  $90^\circ$  counter-clockwise (CCW) rotation. Therefore, an optimal path (denoted with colored arrows) in Scenario 1 is equally optimal in Scenario 2 if we rotate the path similarly. The same happens if the rotation angle is  $180^\circ$  or  $270^\circ$ . We can capture the rotational symmetry using group  $C_4 = \{0^\circ, 90^\circ, 180^\circ, 270^\circ\}$ .

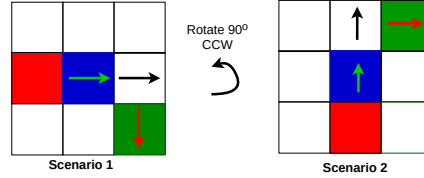

Figure 10: Illustration of domain symmetry. Scenario 2 is the rotated version of Scenario 1 after a  $90^\circ$  counter-clockwise rotation. An optimal path in Scenario 1 can be rotated similarly to become optimal in Scenario 2.

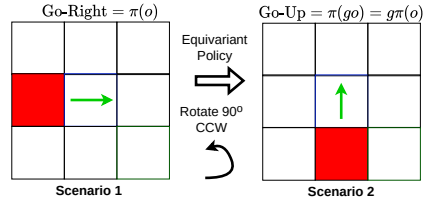

Figure 11: Illustration of the effect of an equivariant policy: the action is automatically rotated when the input observation is rotated.

**Equivariant Policy** We want our policy to automatically capture the domain symmetry above by making it equivariant. In Figure 11, we illustrate the property of an equivariant policy  $\pi$  with  $g$  being a  $90^\circ$  CCW rotation. In Scenario 1, given the first observation  $o$ , we assume that  $\pi$  already knows it should go to the right  $\text{Go-Right} = \pi(o)$  towards the information cell. Now, moving to Scenario 2, when the first observation is the rotated version of  $o$ , denoted as  $g(o)$ . An equivariant policy automatically calculates the next action in Scenario 2 as:

$$\pi(g(o)) = g\pi(o) = g(\text{Go-Right}) = \text{Go-Up} \quad (4)$$

483 **Group Representation** From Equation (4), to construct an equivariant policy, we need to define  
 484 how a rotation  $g$  acts on an observation at the input (i.e., define  $go$ ) and on an action at the output  
 485 (i.e., define  $g\pi(o)$ ). For that purpose, besides defining the group, we need to specify the group rep-  
 486 resentation, i.e., defining an *observation group representation*  $\rho_o$  and an *action group representation*  
 487  $\rho_a$  for  $\pi$  (see below).

488 **Example of Group Acting on Observation and Action** The effect of a  $90^\circ$  CCW rotation  $g$   
 489 on the observation via a *trivial* representation  $\rho_o = \rho_t$  and the action via a *regular* representation  
 490  $\rho_a = \rho_r$  is illustrated in Figure 12. A trivial representation  $\rho_t$  rotates the observation (like rotating  
 491 the normal image) while keeping the pixel values unchanged (the value in cell 0 is still  $(0_0, 0_1)$ ). In  
 492 contrast, a regular representation  $\rho_r$  permutes the action distribution output, resulting in a different  
 action, i.e., Go-Right  $\rightarrow$  Go-Up). This automatic change only happens if the policy is equivariant.

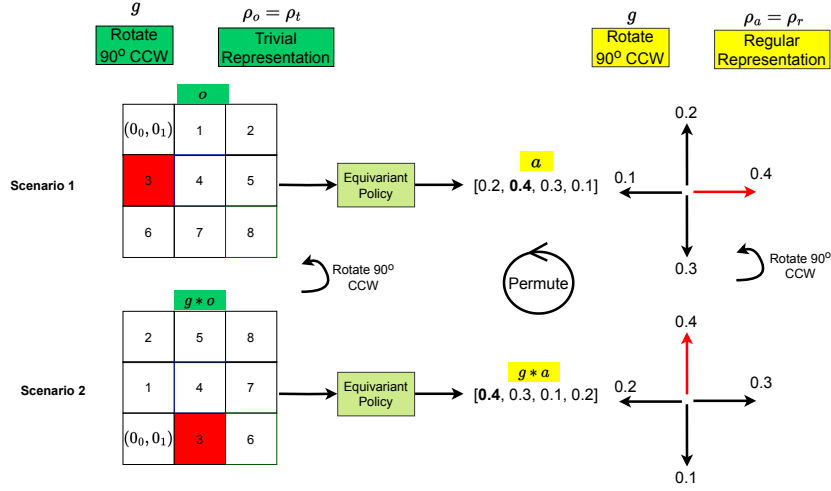

Figure 12: Illustration of the effect of a trivial representation acting on the observation ( $\rho_o = \rho_t$ ) and a regular representation acting on the action ( $\rho_a = \rho_r$ ) with  $g$  being a  $90^\circ$  CCW rotation.  $\rho_o$  rotates the observation and keeps the pixel values unchanged.  $\rho_a$  permutes the action distribution output, resulting in a different action (Go-Right  $\rightarrow$  Go-Up).

493

## B Proof of Theorem 1

In this section, we introduce the framework of history representation MDP [63] and prove a supporting lemma before arriving at the proof.

### B.1 History Representation MDP

A POMDP can be converted into a *history representation MDP* (HR-MDP) [63] whose state is a sufficient statistic of the POMDP history for control, e.g., the well-known *Belief-MDP* [64] construct is a special case of an HR-MDP based on the belief representation. Useful representations such as the belief might require a known POMDP model; however, we adopt a model-free approach with no such knowledge and therefore use the trivial identity representation whereby the history is represented by itself. This effectively converts the POMDP into an equivalent *History-MDP*, which is defined by the tuple  $(\mathcal{H}, \mathcal{A}, \bar{T}, \bar{R})$ , where:

$$\bar{T}(h, a, h') = \mathbb{E}_{o|h,a} [\mathbb{I}\{h' = hao\}] \quad \bar{R}(h, a) = \mathbb{E}_{s|h} [R(s, a)] , \quad (5)$$

where  $\mathbb{I}\{\cdot\}$  is the indicator function, and

$$\Pr(o | h, a) = \mathbb{E}_{s|h} \left[ \sum_{s'} T(s, a, s') O(a, s', o) \right] , \quad (6)$$

$$\Pr(s' | h') \propto \mathbb{E}_{s|h} [T(s, a, s')] O(a, s', o) . \quad (7)$$

### B.2 Supporting Lemma

**Lemma 1.** *The belief function of a group-invariant POMDP (as defined by Definition 1) is group-invariant,*

$$\Pr(gs | gh) = \Pr(s | h) . \quad (8)$$

*Proof By Induction.*

**Base Case.** We first prove that the belief after the first observation is invariant. We note here that the observation function for the first timestep takes the form  $O(s, o)$ , with no preceding action.

$$\Pr(gs_0 | go_0) \propto b_0(gs_0) O(gs_0, go_0) = b_0(s_0) O(s_0, o_0) \propto \Pr(s_0 | o_0) . \quad (9)$$

Since  $\Pr(gs_0 | go_0)$  and  $\Pr(s_0 | o_0)$  are both proportional to the same quantity, and they are both normalized to be distributions over states, then they are themselves equal.

**Inductive Step.** We then prove that if  $\Pr(s_t | h_t)$  is invariant, then  $\Pr(s_{t+1} | h_{t+1})$  is also invariant. Per Equation (7),

$$\begin{aligned} \Pr(gs_{t+1} | gh_{t+1}) &\propto \Pr(gs_t | gh_t) T(gs_t, ga_t, gs_{t+1}) O(ga_t, gs_{t+1}, go_{t+1}) \\ &= \Pr(s_t | h_t) T(s_t, a_t, s_{t+1}) O(a_t, s_{t+1}, o_{t+1}) \propto \Pr(s_{t+1} | h_{t+1}) . \end{aligned} \quad (10)$$

Since  $\Pr(gs_{t+1} | gh_{t+1})$  and  $\Pr(s_{t+1} | h_{t+1})$  are both proportional to the same quantity, and they are both normalized to be distributions over states, then they are themselves equal. By induction, given the base case and the inductive step, the belief function  $\Pr(s_t | h_t)$  is invariant for any  $t$ .  $\square$

### B.3 Proof

*Proof.* We begin by constructing the History-MDP associated with a group-invariant POMDP, and showing that it is itself a group-invariant MDP. The transition and reward functions of the History-MDP are shown in Equation (5) and satisfy the group invariance properties.

For this proof, it is simpler to express the history transition function as  $\bar{T}(h, a, h') = \Pr(o | h, a)$ , where  $o$  is the observation (if any exists) s.t.  $h' = hao$ . If no such observation exists, then  $\bar{T}(h, a, h') = 0$  is trivially invariant. If it does exist, then it is necessarily the last observation of  $h'$ ,

$$\bar{T}(gh, ga, gh') = \Pr(go | gh, ga) = \sum_{s,s'} \Pr(s | gh) \Pr(s' | s, ga) \Pr(go | ga, s')$$

527 since  $g$  permutes the elements of  $\mathcal{S}$ , we can re-index using  $s = g\bar{s}$  and  $s' = g\bar{s}'$ ,

$$\begin{aligned}
&= \sum_{\bar{s}, \bar{s}'} \Pr(g\bar{s} \mid gh) T(g\bar{s}' \mid g\bar{s}, ga) O(go \mid ga, g\bar{s}') \\
&= \sum_{s, s'} \Pr(s \mid h) T(s' \mid s, a) O(o \mid a, s') = \bar{T}(h, a, h'). \tag{11}
\end{aligned}$$

528 By using  $s = g\bar{s}$ , we proceed similarly for history rewards,

$$\begin{aligned}
\bar{R}(gh, ga) &= \sum_s \Pr(s \mid gh) R(s, ga) = \sum_{\bar{s}} \Pr(g\bar{s} \mid gh) R(g\bar{s}, ga) \\
&= \sum_s \Pr(s \mid h) R(s, a) = \bar{R}(h, a). \tag{12}
\end{aligned}$$

529 Therefore,  $\bar{T}(h, a, h')$  and  $\bar{R}(h, a)$  are invariant, and History-MDPs are group-invariant MDPs. By  
530 the theory developed in [1], this implies that the optimal Q-value function  $Q^*(h, a)$  is invariant and  
531 that there exists at least one equivariant deterministic optimal policy  $\pi^*(h)$ . Moreover,

$$\begin{aligned}
V^*(gh) &= Q^*(gh, \pi^*(gh)) = Q^*(gh, g\pi^*(h)) \\
&= Q^*(h, \pi^*(h)) = V^*(h), \tag{13}
\end{aligned}$$

532 this ends our proof by showing that  $V^*(h)$  is invariant.  $\square$

## C Environment Details

### C.1 Grid-world Domains

#### C.1.1 CarFlag-1D

- Action: Go-Left or Go-Right
- Observation (Discrete): The position of the car, the side of the green flag (-1 or 1 if the car is at the blue flag, and 0 otherwise)
- Reward: step reward: -0.01, reaching the green flag: 1.0, and reaching the red flag: -1.0
- Episode Initialization: The car is randomized such that it is not at the information location (blue flag). The goal (green flag) is always either at the leftmost or rightmost end. The red flag is on the opposite end
- Episode Termination: Reaching either flags or an episode lasts more than 50 timesteps
- World size: The distance between the red and the green flag is 50

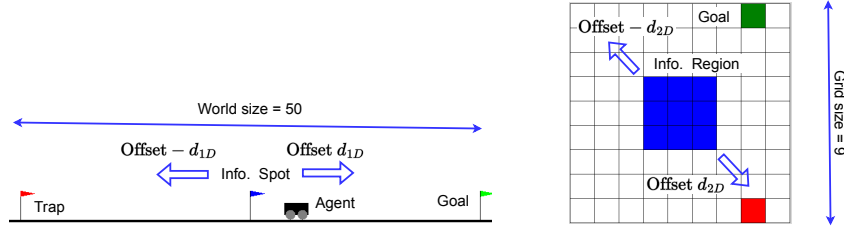

Figure 13: CarFlag-1D and CarFlag-2D domains. The information regions are not visible to the agent. These domains become asymmetric when the offsets from the information region to the world center, i.e.,  $d_{1D}$  and  $d_{2D}$ , are non-zero.

#### C.1.2 CarFlag-2D

- Action: Right/Left/Up/Down
- Observation: The observation is encoded as an  $N \times N \times 2$  image, where  $N$  is the grid size, the first channel encodes the position of the car, and the second channel encodes the position of the green cell. The second channel is only informative when the agent is inside the information region (blue)
- Reward: Reaching the green cell: 1.0, otherwise 0.0
- Episode Initialization: The agent and the goal cell are randomized such that the minimum distance between them is at least two steps. Moreover, both the agent and the goal are not initialized inside the information region (blue)
- Episode Termination: Reached the goal or an episode lasts more than 50 timesteps

### C.2 Robot Manipulation Domains

For these domains, an episode is terminated when it lasts over 50 timesteps or the task is achieved. Because all robot domains share the same observation and action, we only describe them below.

**Action.** An action  $a = (\delta_w, \delta_x, \delta_y, \delta_z, \delta_r)$ , where  $\delta_w \in [0, 1]$  is the absolute openness of the gripper (0: fully open, 1: fully closed),  $\delta_{x,y,z} \in [-0.05, 0.05]$  are the displacements of the gripper in the X, Y, and Z axis, and  $\delta_r \in [-\pi/8, \pi/8]$  is the angular rotation around the Z axis (see Figure 14a)

**Observation.** An observation is a top-down depth image taken from a camera located at the end-effector. Specifically, an observation  $o = (I, k)$ , where  $I \in \mathbb{R}^{84 \times 84}$  is the depth image and  $k \in \{1, 0\}$  indicates the current holding status of the gripper.  $I$  and  $k$  are combined to create a unified depth observation  $o \in \mathbb{R}^{2 \times 84 \times 84}$ . Moreover, two fingers of the gripper are also projected on  $I$  (black squares in Figure 14b)

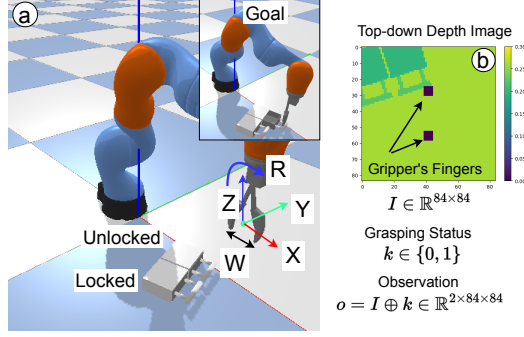

Figure 14: Visual description of Drawer-Opening.

**Partial Observability.** These domains characterize the natural partial observability when certain physical properties of objects, e.g., whether a drawer in Figure 14a is unlocked or not, are often unobservable using pixel observations alone

### C.2.1 Block-Picking

- **Reward:** A reward of 1.0 only when the movable block is picked and brought higher than 8cm
- **Episode Initialization:** The poses of the two blocks are randomized. The arm is initialized at a fixed pose
- **Expert Generation:** An expert (a planner with access to all object poses) randomly chooses one block to pick. If the expert picks the movable block, it will bring the block up to achieve the task. Otherwise, the expert keeps trying for several timesteps before switching to pick the movable block to achieve the task

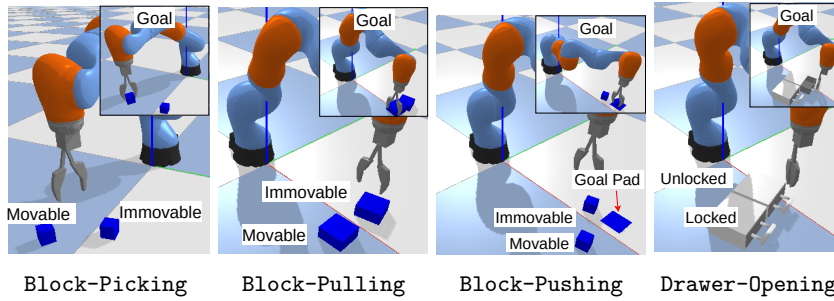

Figure 15: Robot manipulation domains.

### C.2.2 Block-Pulling

- **Reward:** A reward of 1.0 only when two blocks are in contact
- **Expert Generation:** An expert randomly chooses one block to pull towards the other block. If the block is pullable, then it will be pulled towards the other block to achieve the task. Otherwise, the expert keeps trying for a while before pulling the other block

### C.2.3 Block-Pushing

- **Reward:** A reward of 1.0 only when the pushable block is within 5cm from the center of the goal pad. The agent additionally receives a penalty of 0.1 per timestep if it changes the height of the movable block by 5mm to prevent picking the block instead of pushing it
- **Episode Initialization:** The poses of the two blocks and the goal pad are randomly initialized

590       • Expert Generation: An expert randomly chose one block to push towards the goal pad. If  
591       the block is pushable, it will then continue pushing until reaching the goal pad. Otherwise,  
592       the expert keeps trying for several timesteps before doing the same thing with the other  
593       (pushable) block

#### 594   **C.2.4**   Drawer-Opening

595       • Reward: A reward of 1.0 only when the unlocked drawer is opened more than 5cm  
596       • Episode Initialization: Two drawers are randomly placed next to each other with the same  
597       heading angle  
598       • Expert Generation: An expert randomly chooses one drawer to open. If it chooses the  
599       unlocked drawer, it will then open the drawer to achieve the task. Otherwise, the expert  
600       keeps opening the unlocked drawer several timesteps before opening the other drawer

## D Implementation Details

### D.1 Network Structure of Equivariant Recurrent A2C (Equi-RA2C)

Figure 16 shows the specific architecture of Equi-RA2C used in CarFlag domains. Because the actions can be inferred from the observations in these domains, we do not include the feature extractor for the previous actions. We also omit the skip-connections. The input representation is some representation of the observation  $\rho_o$ , depending on the domains (see below).

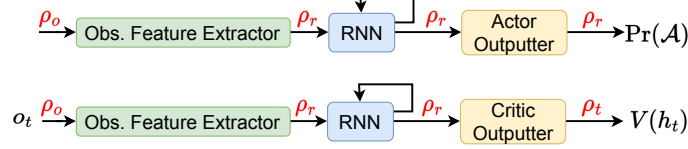

Figure 16: The architecture of Equi-RA2C used in CarFlag-1D and CarFlag-2D.

Figure 17 shows the details of Equi-RA2C used in CarFlag-1D for the flip2d0nR2 group in the escnn<sup>1</sup> [45, 65] library. Notice that the input  $x_t$  for the LSTM cell using the *irreducible* representation of the flip2d0nR2 group denoted as  $\rho_{irr}$ . For CarFlag-1D, using this representation in the input would negate the signs of every component in  $x_t$ , i.e., flipping the positions of the car, the sides of the green flag, and the previous actions in the history. Because the observation in this domain is feature-based, we remove the observation feature extractor and directly feed the observation to the equivariant LSTM.

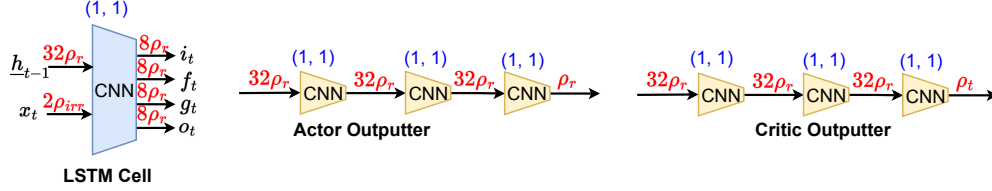

Figure 17: Details of Equi-RA2C used in CarFlag-1D for the flip2d0nR2 group. Numbers inside brackets (blue - on top) denote the value of kernel sizes and strides used for the CNN modules on the bottom. The numbers next to the representations, e.g.,  $32\rho_r$ , denote the number of feature fields.

Figure 18 shows the details of Equi-RA2C used in CarFlag-2D for the  $C_4$  group.

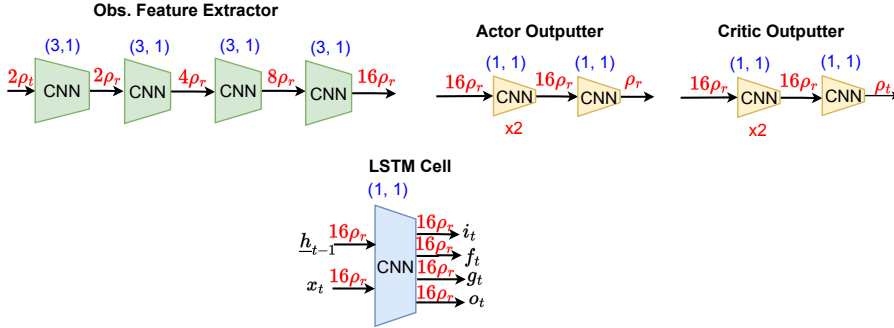

Figure 18: The details of Equi-RA2C used in CarFlag-2D for the  $C_4$  group.

### D.2 Network Structure of Equivariant Recurrent SAC (Equi-RSAC) with $C_4$ Group

Figure 19 shows the details of Equi-RSAC used in the robot manipulation domains with the  $C_4$  group. The input representation is *mixed* for the action feature extractor because the action in-

<sup>1</sup><https://github.com/QUVA-Lab/escnn>

put has components that transform differently under a rotation. Specifically, given an action  $a = (\delta_w, \delta_x, \delta_y, \delta_z, \delta_r)$ , the trivial representation  $\rho_t$  is chosen for the  $\delta_w, \delta_z, \delta_r$  components (which should be unchanged under the rotation). In contrast, the standard representation  $\rho_s$  is chosen for the lateral components  $(\delta_x, \delta_y)$ , which should rotate. For the same reason, for the actor outputter,  $\rho_\mu$  is mixed, i.e., the trivial representations  $\rho_t$  are used for the  $w, z, r$  components, and  $\rho_s$  is used for the  $x, y$  components.

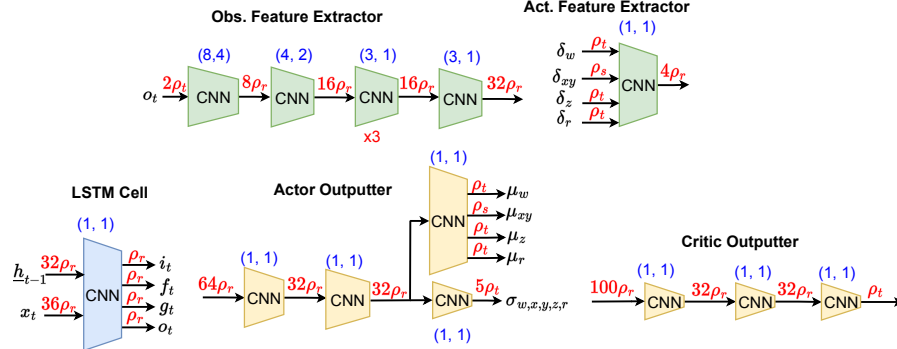

Figure 19: Details of Equi-RSAC with the robot manipulation domains and the  $C_4$  group.

623

### 624 D.3 Implementation Using The ESCNN Library

625 Given the definition of each equivariant component above, we can easily implement it with `escnn`.  
 626 For instance, the following PyTorch [66] code defines the observation feature extractor in Figure 18a  
 627 with ReLU as a non-linearity component:

```
import escnn.nn as enn

# Define group C4
s = escnn.gspaces.rot2d0nR2(4)

# Define in/out representations
repr_i = enn.FieldType(s, 2*[s.trivial_repr])
repr_m0 = enn.FieldType(s, 2*[s.regular_repr])
repr_m1 = enn.FieldType(s, 4*[s.regular_repr])
repr_m2 = enn.FieldType(s, 8*[s.regular_repr])
repr_o = enn.FieldType(s, 16*[s.regular_repr])

obs_feature_extractor = enn.SequentialModule(
    enn.R2Conv(repr_i, repr_m0, 3, 1),
    enn.ReLU(repr_m0),
    enn.R2Conv(repr_m0, repr_m1, 3, 1),
    enn.ReLU(repr_m1),
    enn.R2Conv(repr_m1, repr_m2, 3, 1),
    enn.ReLU(repr_m2),
    enn.R2Conv(repr_m2, repr_o, 3, 1),
    enn.ReLU(repr_o),
)
```

628 Implementing the mixed representation is also straightforward by summing different field  
 629 types. In order to create the actor and the critic, we simply chain components by using the  
 630 `SequentialModule` as in native PyTorch.

### 631 D.4 Training Details

632 We implement using PyTorch. The batch size for all agents is 32 (episodes). The replay buffer  
 633 has a capacity of 100,000 transitions. We use the Adam optimizer [67] with a learning rate of  $3e$   
 634  $4$  for actors and critics and  $1e-3$  for optimizing  $\alpha$  for SAC-based agents. The target entropy  $\bar{H}$

635 for SAC-based agents is  $-\dim(\mathcal{A})$  followed the common practice, and  $\alpha$  is initialized at 0.1. After  
636 prepopulating the replay buffer with 80 expert episodes, the buffer is filled with 20 episodes with  
637 random actions. We use the same 1:1 environment/gradient step ratio for all agents.

## 638 **D.5 Implementing Equivariant LSTM**

639 We implement the equivariant LSTM [47] based on a public code of ConvLSTM [48] at <https://github.com/Hzzone/Precipitation-Nowcasting> as the authors did not release the official  
640 code.  
641

## 642 E Baseline Details

643 **RA2C [51]** We modified the code at [https://github.com/ikostrikov/](https://github.com/ikostrikov/pytorch-a2c-ppo-acktr-gail)  
644 [pytorch-a2c-ppo-acktr-gail](https://github.com/ikostrikov/pytorch-a2c-ppo-acktr-gail). We used 16 environments in parallel and used recurrent  
645 policies. Other hyper-parameters are kept at default.

646 **DPFRL [14]** We used the authors' code at <https://github.com/Yusufma03/DPFRL>. We used  
647 30 particles, MGF particle aggregation type, and the hidden dimension is 128.

648 **RAD [54]** We collected depth images of size 90x90 to perform random cropping to reduce the size  
649 to 84x84. We perform the same type of random cropping for every depth image within an episode.

650 **DrQ [55]** We used random shift of  $\pm 4$  pixels as suggested by the original work. The same type of  
651 shifting is used for every depth image within a sequence. We also followed the authors' suggestions  
652 when using the numbers of augmentations for calculating the Q-targets and the Q-values are  $K = 2$   
653 and  $M = 2$ , respectively.

654 **SLAC [56]** We used a Pytorch implementation at [https://github.com/toshikwa/slac.](https://github.com/toshikwa/slac.pytorch)  
655 [pytorch](https://github.com/toshikwa/slac.pytorch), which has been benchmarked against the performance reported in the original paper. We  
656 pre-train the latent variable model for 2k steps before iterating between data collection, model up-  
657 date, and evaluation. We also pre-fill the replay buffer with the same number of expert and random  
658 episodes before training and use four extra augmented episodes for each episode during training  
659 to ensure a fair comparison. The sequence length is extended from 8 (originally) to 50 (maximum  
660 episode length). We varied the sequence length for better performance, but the performance did not  
661 improve much. For any episode shorter than 50 steps, we zero-pad dummy transitions *in front*.

662 **DreamerV2 [52]** We used the official code at <https://github.com/danijar/dreamerv2>. For  
663 CarFlag domains, we mainly keep the default hyper-parameters (suggested by the authors). In  
664 CarFlag-2D, the observation image is extended to have the size of  $64 \times 64 \times 3$  by zero-padding  
665 around the original image and is added with a dummy channel (all zero).

666 **DreamerV3 [53]** We used the official code at <https://github.com/danijar/dreamerv3> and  
667 performed similar steps like in the case of DreamerV2. We used the *small* world models with about  
668 18M trainable parameters (predefined in the repo's configuration file) for our CarFlag domains.

## 669 F Visualization of SLAC Reconstructed Images

670 Figure 20 shows the comparison between the depth images produced by the trained latent model of  
 671 SLAC [56] (top row) and the ground-truth ones (bottom row) in Block-Pulling after 40k training  
 672 steps. It can be seen that small squares representing the gripper have been reconstructed quite well,  
 673 but the model fails to reconstruct the two blocks representing the gripper’s position in the scene.

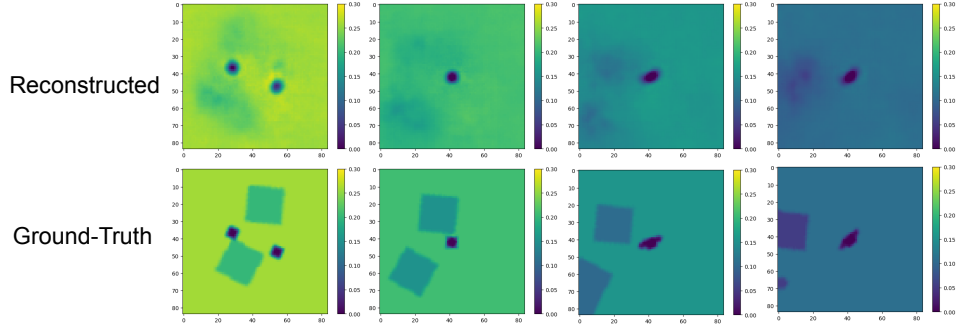

Figure 20: Images reconstructed by the latent model of SLAC [56] in Block-Pulling: reconstructed (top row), ground-truth (bottom row).

## 674 G Visualization of Data Augmentations

675 We show visualizations of different ways for augmenting the observations with a training se-  
 676 quence in Drawer-Opening: random rotation (Figure 21), random crop (Figure 22), and random  
 677 shift (Figure 23). Note that the same operation (rotation/crop/shift) is applied similarly to every  
 678 observation in an episode. For each training episode, we perform this augmentation four times to  
 generate four auxiliary episodes.

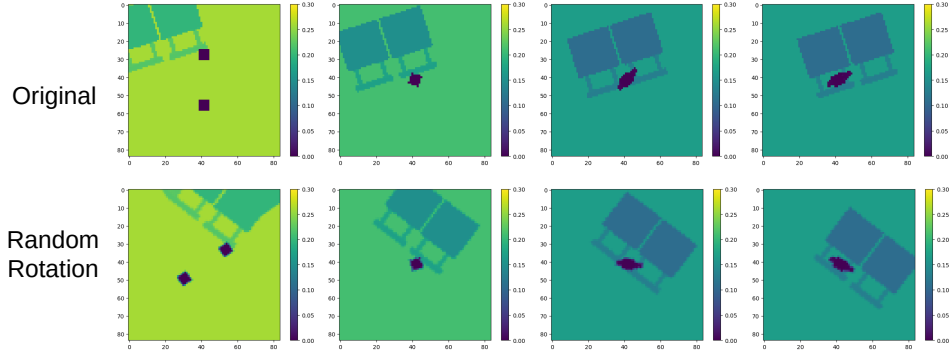

Figure 21: Visualization of randomly rotated augmentations in Drawer-Opening: original obser-  
 vations (top row), randomly rotated observations (bottom row).

679

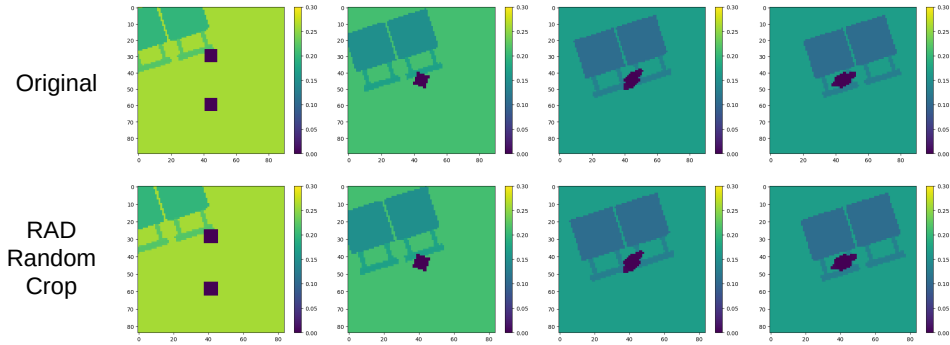

Figure 22: Visualization of randomly cropped augmentation for RAD [54] in Drawer-Opening:  
 original observations (top row), randomly cropped observations (bottom row).

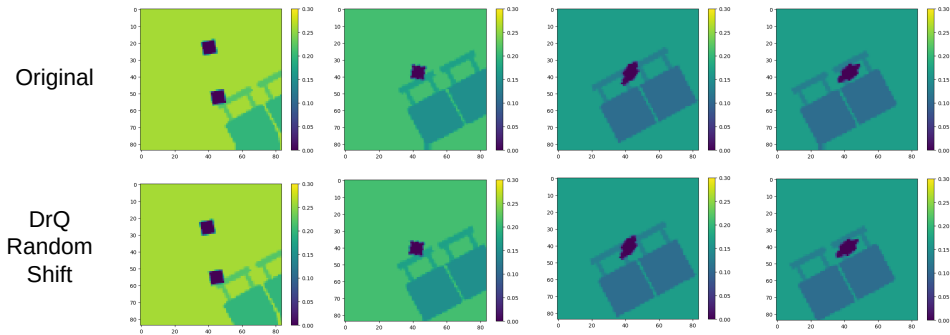

Figure 23: Visualization of randomly shifted augmentation for DrQ [55] in Drawer-Opening: orig-  
 inal observations (top row), randomly shifted observations (bottom row).

## 680 H Ablation Studies

### 681 H.1 Equivariant Actor or Critic Only

682 In Figure 24, we additionally show the learning performance when only either actor or critic is  
683 equivariant in Block-Pushing and Drawer-Opening. From the figure, having an equivariant critic  
684 (purple) is more beneficial than having an equivariant actor (blue). However, having both being  
685 equivariant (green) yields the best performance.

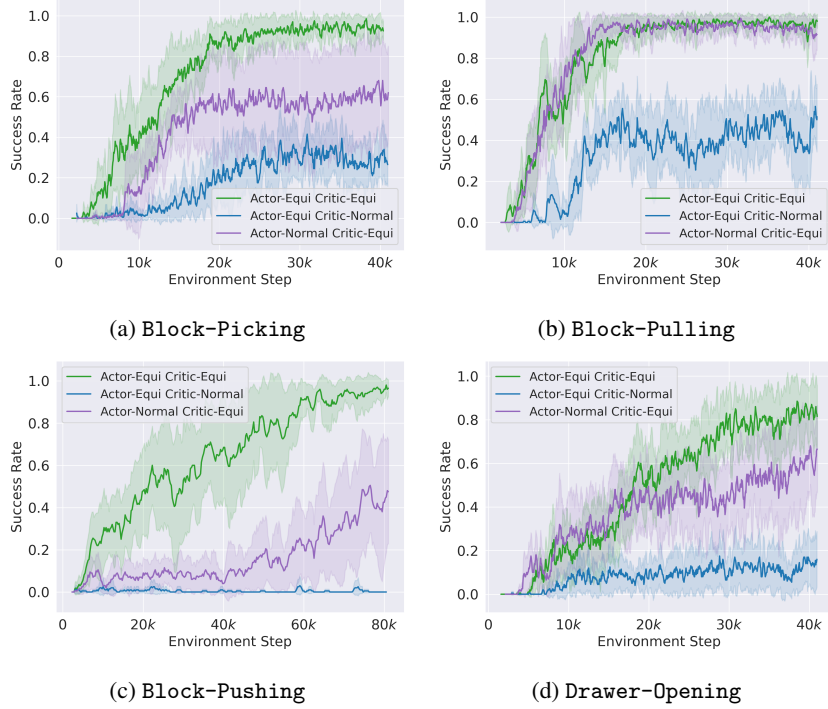

Figure 24: Comparing the effect of only using equivariant actor or critic.

## 686 H.2 Different Symmetry Groups

687 Figure 25 shows the performance when the  $C_4$  and  $C_8$  symmetry groups in the robot manipulation  
 688 domains. Using  $C_4$  is much better than using  $C_8$  in Block-Pushing, but the two groups perform  
 689 similarly in the remaining domains. Furthermore, it is possible to use other group symmetries which  
 690 extend  $C_n$  with reflection, such as the dihedral groups  $D_4$  or  $D_8$ .

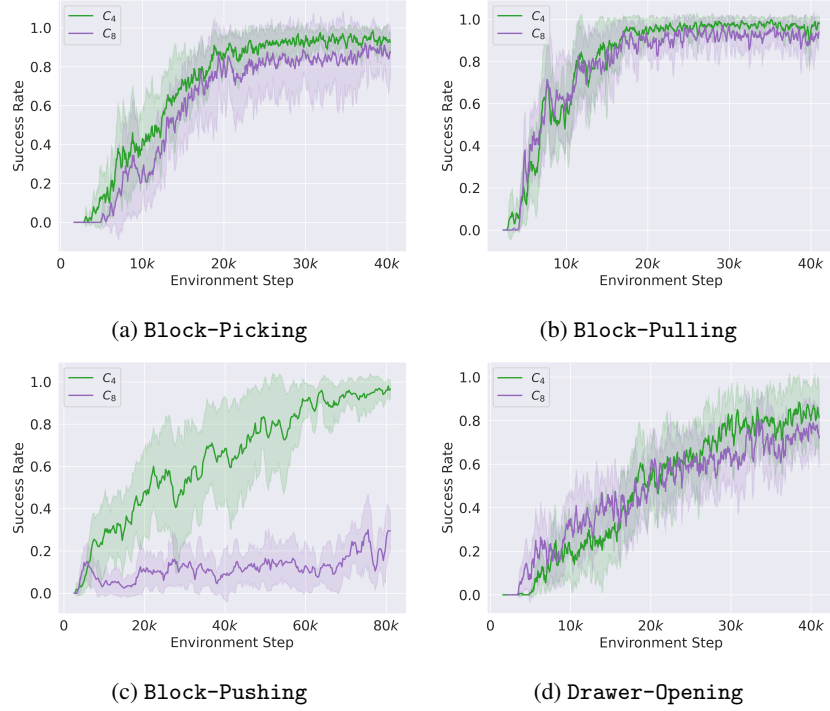

Figure 25: Comparing the effect of using symmetry groups  $C_4$  and  $C_8$ .

### 691 H.3 Randomly Initialized Cell and Hidden States of Equivariant LSTM

692 Figure 26 shows the performance when the equivariant LSTM is initialized with random instead  
693 of zero cell and hidden states. Random initialization results in a worse performance because the  
694 equivariance of the actor and the critic is broken. However, our method is generally robust to this  
695 change when the performance is still better than the baselines.

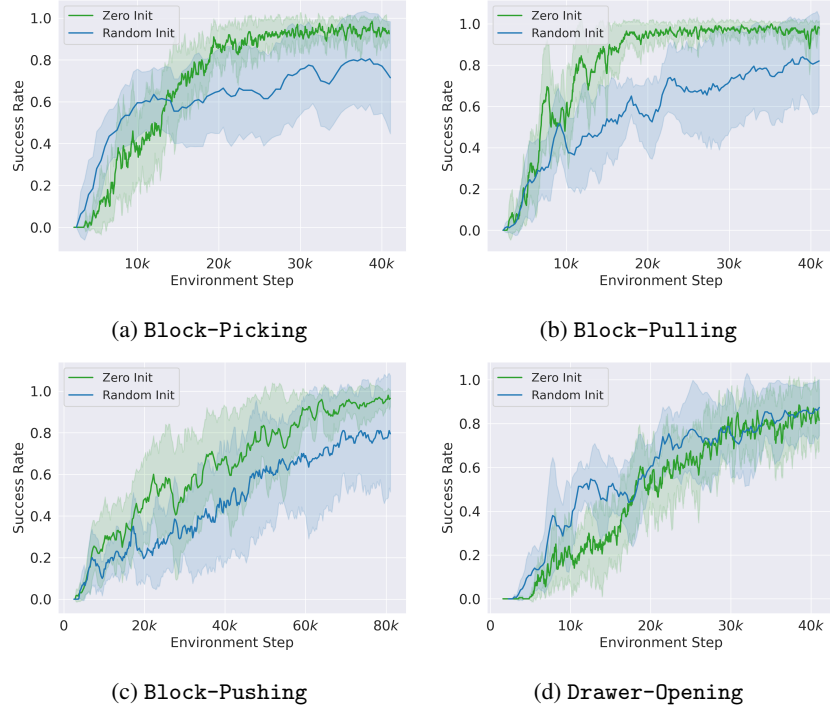

Figure 26: Comparing the performance when initializing the cell and hidden states of the equivariant LSTM with zero and random values. Random initialization results in a worse performance because the actor and the critic’s equivariance is broken.

## 696 I Additional Experimental Results

### 697 I.1 Performance in Asymmetric CarFlag Domains

698 Figure 27 shows the evaluation success rates in asymmetric variants of CarFlag domains with different offsets.

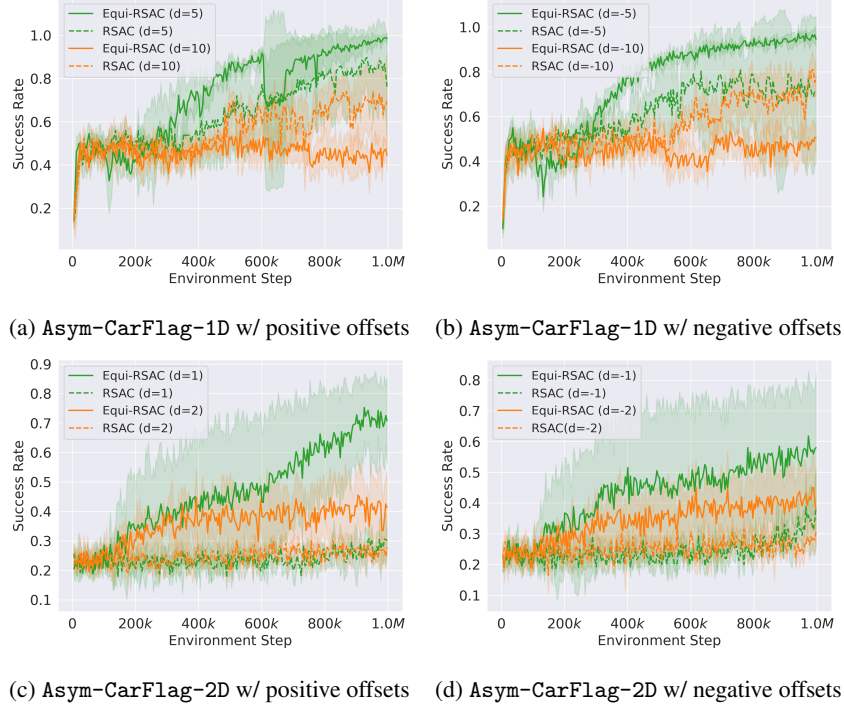

Figure 27: Learning performance with asymmetric version of CarFlag domains.

699

### 700 I.2 Performance in Variants of CarFlag Domains

701 Figure 28 show the evaluation success rates in different variants of CarFlag domains with a different world size and grid size. Our equivariant agent still outperforms other baselines.

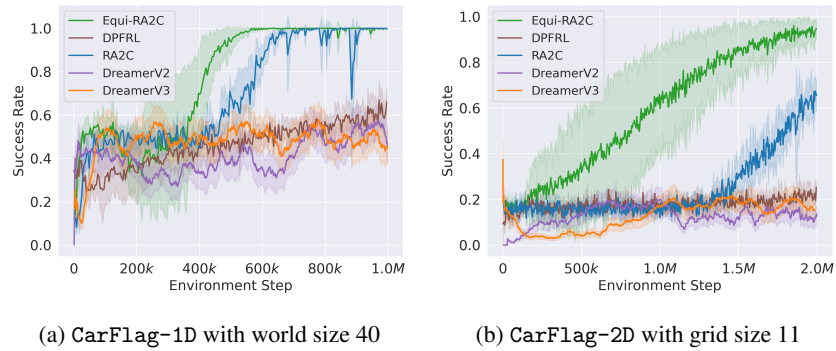

Figure 28: Learning performance in CarFlag domains with different sizes.

702

### 703 I.3 Effect of Rotational Augmentation

704 Figure 29 shows that including rotational augmented episodes significantly improves the learning  
 705 performance of equivariant agents. These rotational augmented episodes possibly help equivariant  
 agents distinguish different discrete rotations within a group, thus boosting performance.

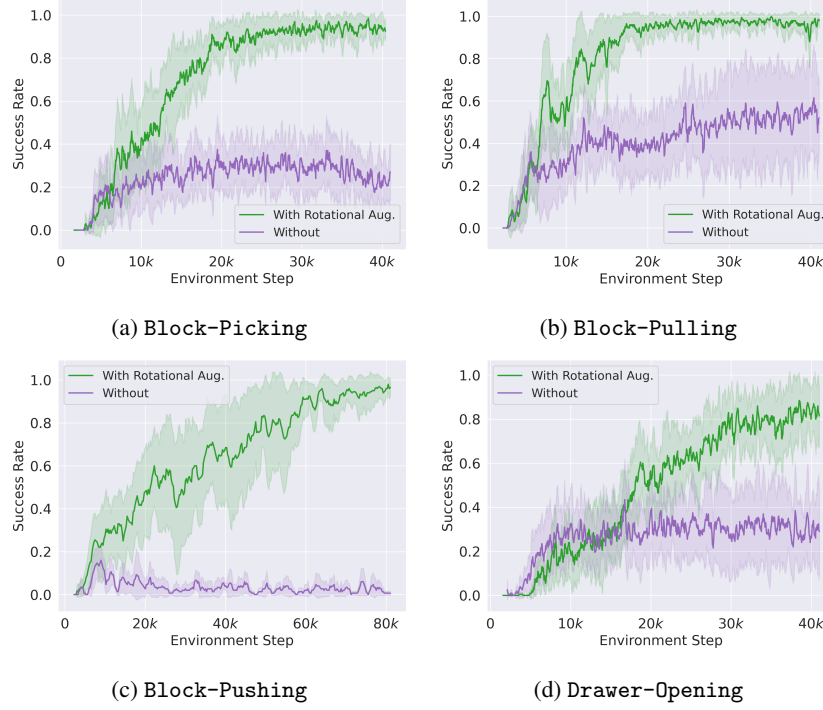

Figure 29: Comparing the performance of our equivariant agents when using/not using rotational augmentation episodes.

706

#### 707 I.4 Effect of Number of Demonstration Episodes

708 Figure 30 shows that the performance improves when using more demonstrations in all domains, as expected.

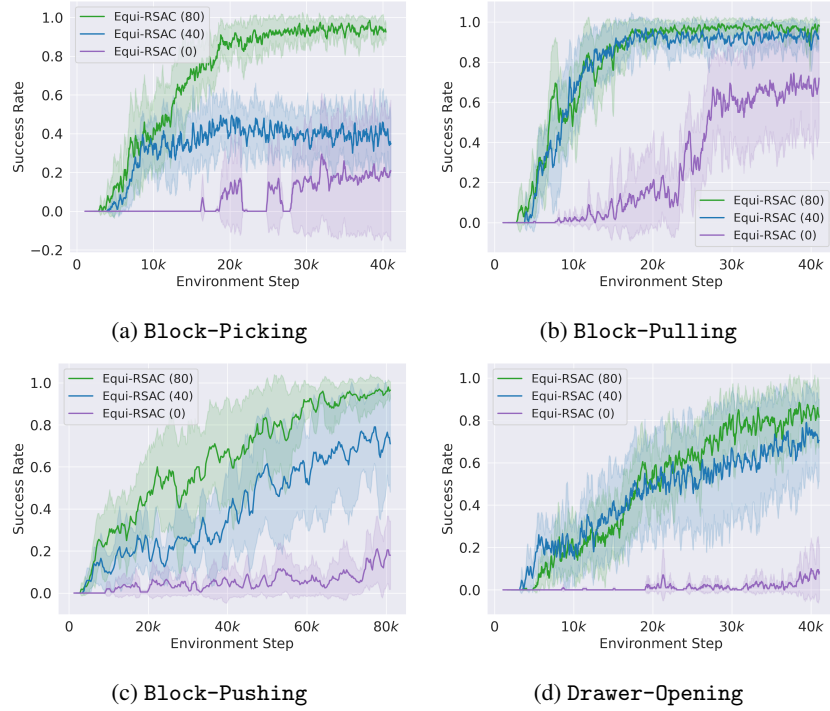

Figure 30: Using different numbers of demonstration episodes.

709
